# Supplementary material for: Unconventional Fulde-Ferrell-Larkin-Ovchinnikov statein a two-dimensional Ising superconductor
Source: Research Square preprint supplement (doi:10.21203/rs.3.rs-2225877/v1), 2022-11-07
Supplement: Supplementary file 1 [file 94322f953e3ca30d3e7e9b93.pdf]

Supplementary information for

**Unconventional Fulde-Ferrell-Larkin-Ovchinnikov phase  
in a two-dimensional Ising superconductor**

Puhua Wan<sup>1</sup>, Oleksandr Zheliuk<sup>1,2</sup>, Noah F. Q. Yuan<sup>3</sup>, Xiaoli Peng<sup>1</sup>, Le Zhang<sup>1</sup>, Minpeng Liang<sup>1</sup>,  
Uli Zeitler<sup>2</sup>, Steffen Wiedmann<sup>2</sup>, Nigel Hussey<sup>2</sup>, Thomas T. M. Palstra<sup>4</sup>, and Jianting Ye<sup>1</sup>

*<sup>1</sup>Device Physics of Complex Materials, Zernike Institute for Advanced Materials,  
University of Groningen, 9747 AG Groningen, The Netherlands*

*<sup>2</sup>High Field Magnet Laboratory (HFML-EMFL), and Institute of Molecules and Materials,  
Radboud University, Toernooiveld 7, 6525 ED Nijmegen, Netherlands*

*<sup>3</sup>School of Science, Harbin Institute of Technology, Shenzhen 518055, China*

*<sup>4</sup>University of Twente, Drienerlolaan 5, 7522 NB Enschede, The Netherlands*

- 1    **1.    Mean-free path and clean superconductivity**
- 2    **2.    Simulated effect of canting on 2D superconductors**
- 3    **3.    The magnitude of six-fold anisotropy**
- 4    **4.    In-plane isotropy of monolayer MoS<sub>2</sub>**
- 5    **5.    Excluding the two-gap scenario for the upturn in  $B_{c2}$  ( $T$ )**

## 1. Mean-free path and clean superconductivity

For semiconducting  $2H$ -polytype transition metal dichalcogenides (TMDs such as the  $2H$ -MoS<sub>2</sub> and WS<sub>2</sub>), the low-doping metallic state can have all carriers confined in a single band. Therefore, the 2D carrier density  $n_{2D}$  can be experimentally determined by measuring the Hall effect, where the  $n_{2D}$  is related to the Hall coefficient  $R_H$  as

$$n_{2D} = -\frac{1}{R_H e}. \quad (S1)$$

In contrast, the metallic  $2H$ -NbSe<sub>2</sub> has a complex Fermi surface composed of five pockets, having both hole and electron-like carriers. From the zone center, hole-like carriers are found in multiple pockets including a small pancake-shaped pocket closed at  $\Gamma$  point as well as honeycomb-shaped and triangular-shaped cylindrical pockets centered at  $K$  and  $\Gamma$  points, respectively. Also, two electron-like pockets have honeycomb and triangular cylindrical shapes at  $K$  and  $\Gamma$  points, respectively<sup>1</sup>. The small pancake pocket at  $\Gamma$  point is either gapless or has a very small gap that is easily suppressed in a parallel external field due to its 3D Nature. It was reported that the small pancake pocket at  $\Gamma$  point is gapless even at a temperature much lower than  $T_{c0}$  ( $\sim 0.003T_{c0}$ ) and gives rise to the quantum oscillations in the superconducting states<sup>1,2</sup>. The larger superconducting gaps open on the Fermi surface at the large hole-like pockets at  $K$  and  $\Gamma$  points, as shown in the ARPES measurements<sup>2,3</sup>.

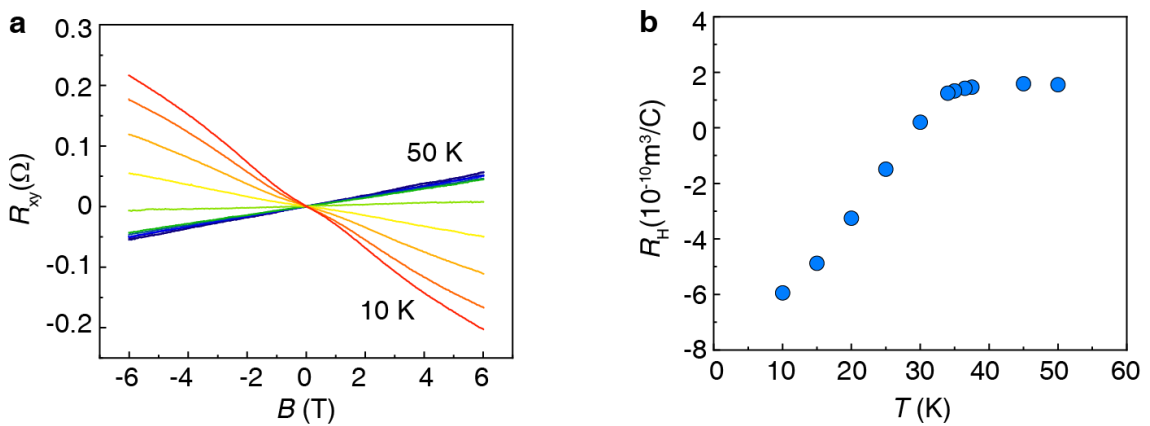

**Figure S1 | Temperature dependence of Hall coefficient.** **a.** Hall effect measurement at different temperatures. The transverse  $R_{xy}(B)$  curve is shifted vertically at  $B = 0$  to null the small pickup from the longitudinal  $R_{xx}$  channel. **b.** The Hall coefficient as a function of temperature.

1 Having carriers from two Fermi pockets, say contributed by both electrons and holes with carrier  
 2 density  $n$  and  $p$ , then the  $R_H$  is

$$3 \quad R_H = \frac{nu_n^2 - pu_p^2}{e(nu_n + pu_p)^2}, \quad (S2)$$

4 where  $u_n$  and  $u_p$  the electron and hole mobilities, respectively. As shown in Fig. S1a, the  $R_H$  of NbSe<sub>2</sub>  
 5 flake changes the sign showing a switch from the hole- to electron-like transport at  $T \sim T_{CDW}$ , which is  
 6 consistent with Ref. 4 of this supplementary information. In the low  $B$  field, Ong<sup>5</sup> shows that the Hall  
 7 transport of mixed carriers can be described as

$$8 \quad R_H = \frac{2\pi d(l_p^2 - l_n^2)}{e[(k_{F,p}l_p)^2 + (k_{F,n}l_n)^2]}. \quad (S3)$$

9 The  $l_n$ ,  $l_p$  and the  $k_{F,n}$ ,  $k_{F,p}$  are the mean free paths and the wave vectors of holes and electrons,  
 10 respectively. Due to the dramatic increase of electron mean-free path, the  $R_H$  changes the sign below  
 11  $T_{CDW}$ . Since the electrons are the minority above  $T_{CDW}$ , we can assume there is a single type of carrier  
 12 and use the  $R_H$  measured at  $T = 40$  K  $> T_{CDW}$  (as shown in Fig. S1b) to estimate the carrier density of  
 13 holes using Eq. S1. The estimated hole concentration is  $p \approx 2.4 \times 10^{15}$  cm<sup>-2</sup> for a single layer, which is  
 14 larger than the results from band structure calculation<sup>4</sup>  $p = 8.51 \times 10^{14}$  cm<sup>-2</sup>. Using this larger  $p$ , we  
 15 can estimate the lower limit of the mean-free-path using the 2D Drude's formula,

$$16 \quad l_{2D} = \frac{h}{e^2} \frac{\sigma_{2D}}{\sqrt{2\pi p}}, \quad (S4)$$

17 where  $\sigma_{2D} = \frac{1}{NR_s}$  is the conductance of a single layer, where  $N$  is the total layer number. From the sheet  
 18 resistance  $R_s$  measured right above  $T_c$ , we can determine the mean-free-path  $l_{2D} \approx 30$  nm. The zero  
 19 temperature Ginzburg-Landau (GL) coherence length  $\xi$  can be extracted from the temperature  
 20 dependence of the upper critical field  $B_{c2,\perp}$  in the perpendicular magnetic fields

$$21 \quad B_{c2,\perp} = \frac{\Phi_0}{2\pi\xi(0)^2 \left(1 - \left(\frac{T}{T_c}\right)\right)}, \quad (S5)$$

22 where  $\Phi_0$  is the flux quantum. At  $T = 0$  K, the GL  $\xi(0) = 8.3$  nm. From the GL  $\xi$ , we can obtain the  
 23 Pippard coherence length of a clean superconductor  $\xi_0 = 1.35\xi(0) = 11.2$  nm<sup>6</sup>. Satisfying  $\xi_0 < l_{2D}$   
 24 brings our system into the clean limit.

1       As shown in Eq. S5, for a multi-gap superconductor, a smaller gap, with a smaller  $B_{c2,\perp}$ , has a  
 2       larger  $\xi_0$ . Therefore, the larger  $\xi_0$ , associated with the smaller gaps, may violate the clean-limit criteria  
 3        $\xi_0 < l_{2D}$ . On the other hand, the smaller gaps are also easier to be suppressed by the external  $B$  fields.  
 4       Hence, in high fields where the orbital FFLO phase appears, the larger gaps, surviving at  $B > B^*$ , ensure  
 5       a clean superconductivity in the orbital FFLO regime.  
 6

## 2. Simulated effect of canting on 2D superconductors

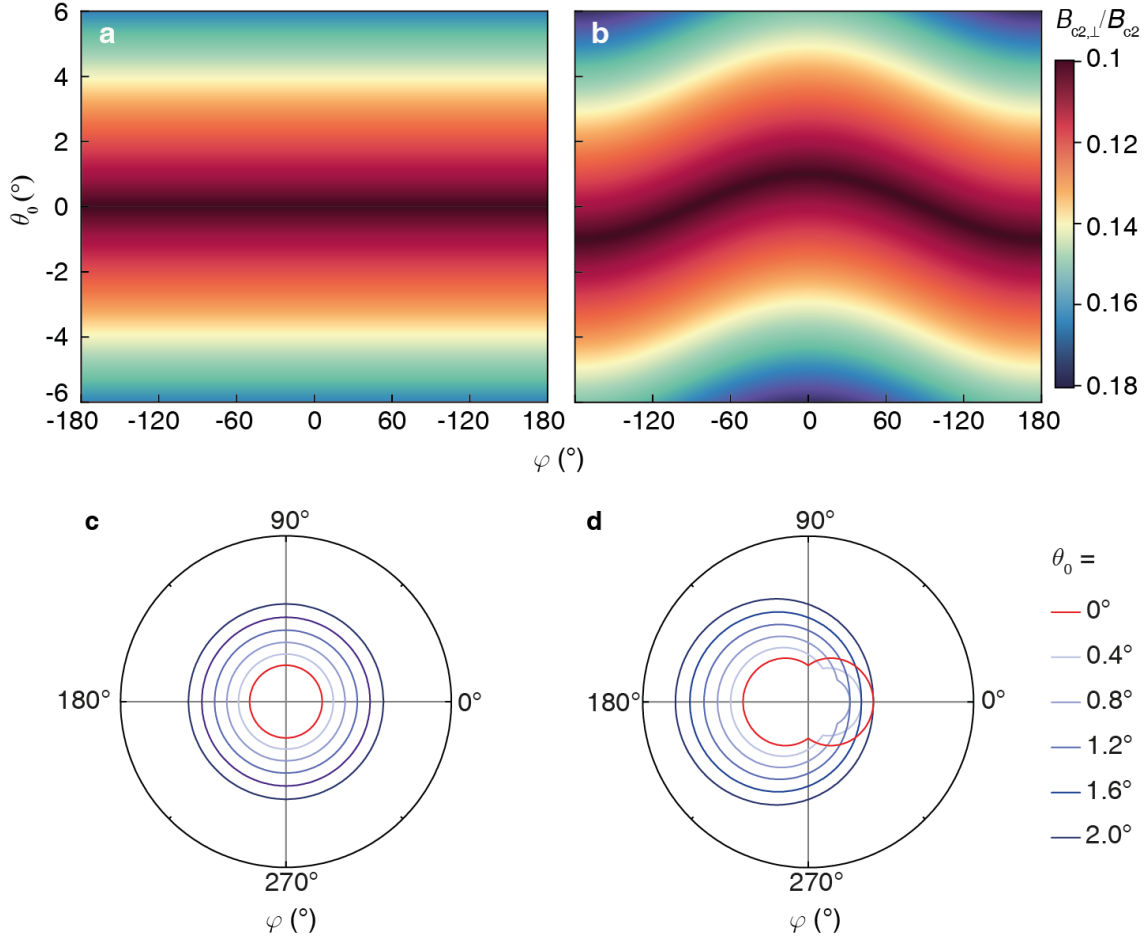

3

**Figure S2 | Simulated effect of canting on an isotropic 2D superconductor.** We simulate a superconductor with an anisotropy  $B_{c2}^{\parallel}/B_{c2}^{\perp} = 10$ , which is typically found in Ising superconductors. The canting angle is set as **a.**  $\gamma = 0^\circ$  and **b.**  $\gamma = 1^\circ$ . The polar plots of  $B_{c2}^{\perp}/B_{c2}$  show **c.** isotropic for  $\gamma = 0^\circ$ , whereas shows **d.** a fake two-fold anisotropy when  $\gamma \neq 0$ .

8

It is worth emphasizing that having the  $\gamma$  can pick up the effect of misaligned  $B$  fields, leading to wrong conclusions for the anisotropy of superconductivity at in-plane  $B$  fields. In Fig. S2 we show the simulated  $B_{c2}(\varphi, \theta_0)$  of isotropic 2D superconductivity combining Eq. 4 and Eq. 5 in the Methods. The out-of-plane anisotropy is set as  $B_{c2}^{\parallel}/B_{c2}^{\perp} = 10$ , mimicking a typical Ising superconductor with large anisotropy. When the effect of  $\gamma$  is ignored (in this case,  $\theta_0$  is a constant), the  $B_{c2}(\varphi)$  oscillates as a function of  $\varphi$ , exhibiting a two-fold symmetry as shown in Fig. S2d. This erroneous two-fold anisotropy originates from picking up the  $B_{\perp}$  components due to the canting.

15

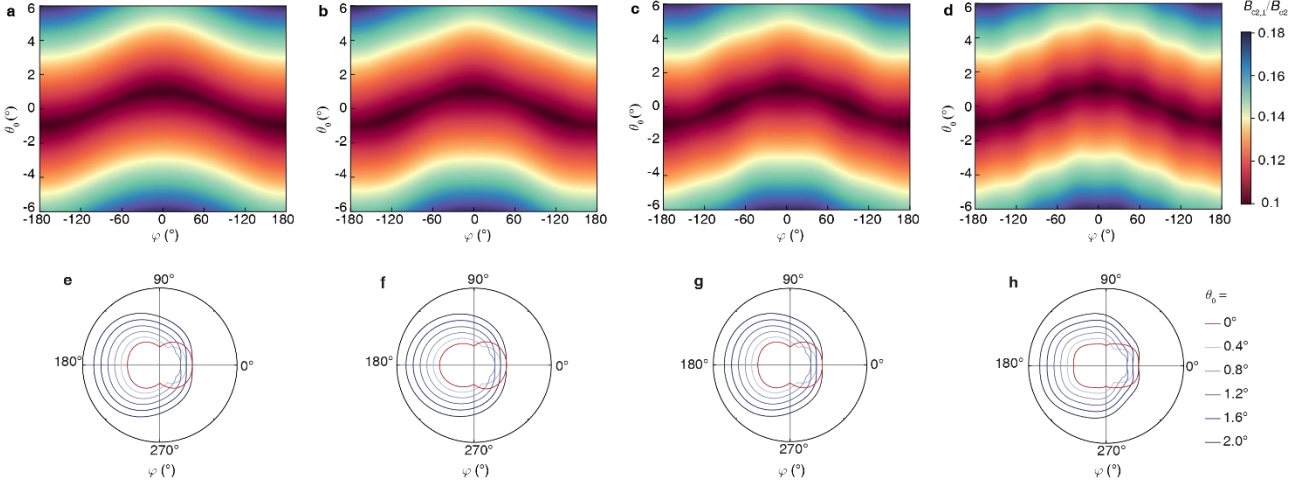

**Figure S3 | Simulated effects of having a canting angle in measuring 2D superconductors with intrinsic in-plane anisotropies.** We set the out-of-plane anisotropy  $B_{c2}^{\parallel}/B_{c2}^{\perp} = 10$  and the canting angle  $\gamma = 1^{\circ}$ . The intrinsic in-plane anisotropy of the 2D superconductor is simulated as  $B_{c2}(\varphi, \theta = 0) = a + b\cos(\frac{n\pi\varphi}{180})$  with  $n$  denoting the folds of the intrinsic anisotropy. The amplitude of in-plane anisotropy is  $\frac{B_{c2,||}^{max} - B_{c2,||}^{min}}{B_{c2,||}^{max}} = \frac{2b}{a+b} = 0.02$ . The effect of cantering on  $B_{c2}(\varphi)$  is plotted as mapping for **a.** two-, **b.** three-, **c.** four-, and **d.** six-fold intrinsic anisotropies. **e - h.** The corresponding polar plots all show erroneous two-fold anisotropies.

Furthermore, we simulate how the presence of  $\gamma$  can obscure the intrinsic anisotropy. We first introduce an intrinsic anisotropy, manifested in the upper critical field as  $B_{c2}(\varphi, \theta = 0) = a + b\cos(\frac{n\pi\varphi}{180})$ , where  $n$  denotes the number of folds of the anisotropy. We assume the amplitude of in-plane anisotropy  $\frac{B_{c2,||}^{max} - B_{c2,||}^{min}}{B_{c2,||}^{max}} = \frac{2b}{a+b} = 0.02$  which is close to our present measurement. In the presence of  $\gamma$ , the  $B_{\perp}$  component can show a two-fold anisotropy, hence inducing “fake” two-fold anisotropies in  $B_{c2}(\varphi)$ . Due to the direct orbital contribution from the two-fold  $B_{\perp}$ , the contribution is much stronger than the intrinsic three-, four-, or six-fold anisotropy (Fig. S3e-h). Therefore, eliminating the influence of the canting angle  $\gamma$  is an essential step for the accurate determination of intrinsic in-plane anisotropies, which is indispensable for 2D superconductors with strong anisotropies.

### 3. The magnitude of six-fold anisotropy

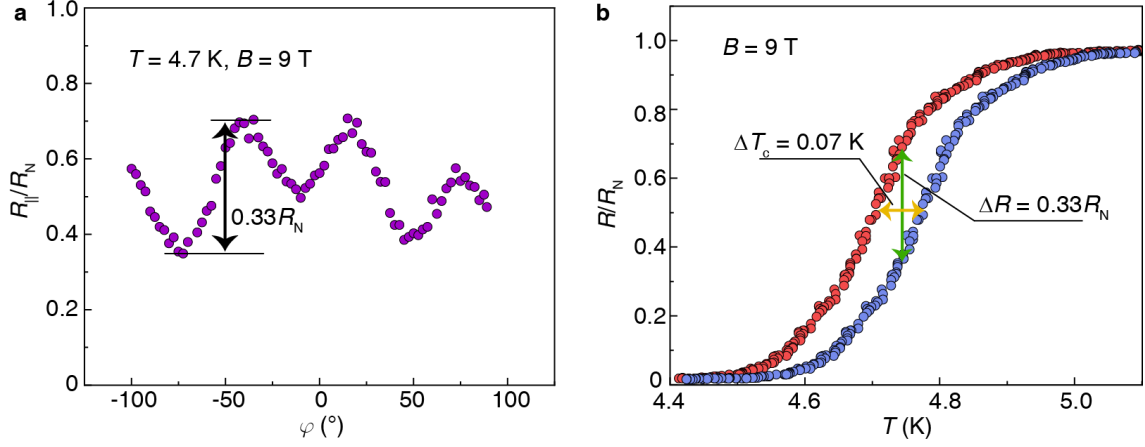

**Figure S4 | Evaluating the amplitude of the six-fold anisotropy at  $B = 9$  T.** **a.** From the same data shown in Main Text Fig. 3c at  $T = 4.7$  K and  $B = 9$  T (main text), the resistance oscillates as a function of  $\varphi$ , due to the change of  $T_c$  at different  $\varphi$  angles. The amplitude is determined as  $R_{\parallel, \max} - R_{\parallel, \min} = 0.33R_N$ . **b.** The superconducting transition at  $B = 9$  T (red dots) is shifted horizontally by  $\Delta T_c = 0.07$  K. The amplitude of six-fold anisotropy is quantified as  $4k_B\Delta T_c = 0.02$  meV. Here, the coefficient 4 was used in the analysis of the largest gap at the  $K$  pockets reported in ARPES measurements<sup>7</sup>.

Although the accuracy of the angle sensor of our rotation stage is better than  $0.1^\circ$ , it still limits the precision in aligning the  $B$  field parallel to the 2D sample surface. We assume a limiting case in which the maximum angular error is doubled to  $0.2^\circ$  when we compare the  $T_c$  values at two different  $\varphi$  values. As shown in Fig. 2b in the main text, the deviation of  $0.2^\circ$  leads to an error of 0.2 T in  $B_{c2}$  when  $\theta$  is close to  $0^\circ$ . The angular accuracy limits the determination of exact energy scales by measuring the  $B_{c2}$  as a function of  $\varphi$ .

On the other hand, as shown in Main Text Fig. 3c, the amplitude of the six-fold anisotropy grows with the increase of  $B$  field after entering the orbital FFLO phase. At a given temperature and magnetic field along the FFLO phase boundary, a state with smaller resistance corresponds to a higher  $T_c$ . Therefore, we can quantify the in-plane anisotropy of  $T_c$  by measuring the azimuthal  $\varphi$  dependence of  $R(\varphi, \theta = 0)$ . At  $B_{\parallel} = 9$  T, we find the  $R_{\parallel, \max} - R_{\parallel, \min} = 0.33R_N$ .

For the maximum change of  $0.33R_N$  caused by the azimuthal rotation, we can then determine the corresponding change of  $\Delta T_c$  from the  $R(T)$  dependences. As shown in Fig. S4a, the  $R_{\parallel, \max}$  and  $R_{\parallel, \min}$  appears at  $0.7R_N$  and  $0.37R_N$ , respectively. Therefore, we shift the  $R(T)$  dependence measured at  $B_{\parallel} = 9$

1 T to  $R(T + \Delta T_c)$ . As shown in Fig. S4b, the shift ensures that  $\Delta R = 0.33R_N$  for the minimum  $T_c$  appears at  
2  $\sim 0.7R_N$  and maximum  $T_c$  at  $\sim 0.4R_N$ , respectively. The corresponding  $\Delta T_c$  is then determined as 0.07 K.

3 The amplitude of gap anisotropy is quantified as  $xk_B\Delta T_c$ , where  $k_B$  is the Boltzmann constant. As  
4 indicated by the ARPES measurement<sup>7</sup>, the coefficient  $x$  is 4 for the larger superconducting gap at the  $K$   
5 pockets and 1.76 for the smaller one at  $\Gamma$  pockets. Here, we choose the largest gap at the  $K$  pockets, which  
6 have a medium coupling strength (9) and remains open at  $B = 9$  T. Hence the  $\Delta T_c = 0.07$  K yields an  
7 anisotropy of  $4k_B\Delta T_c = 0.02$  meV in the orbital FFLO state, which is about 0.8% of the largest  
8 superconducting gap at the  $K$  pocket (2.5 meV).

9

## 4. In-plane isotropy of monolayer MoS<sub>2</sub>

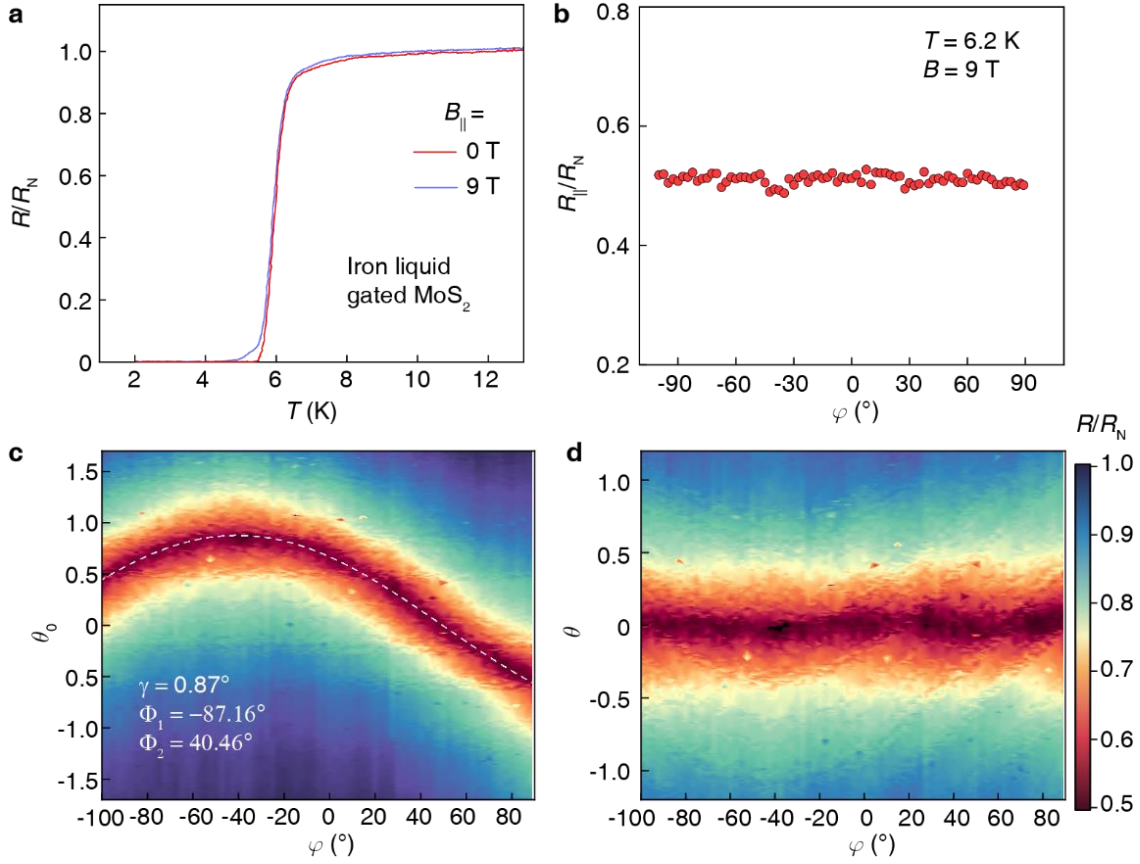

**Figure S5 | In-plane isotropy of ion-gated monolayer superconductivity in a multilayer MoS<sub>2</sub>.** **a.** Superconducting transition in in-plane field  $B = 0$  and  $9$  T. **b.** Magnetoresistance  $R_{\parallel}(\varphi)$  remains constant at different  $\varphi$  showing isotropic response. **c.** Mapping of  $R(\theta_0, \varphi)$  before subtracting the effect of canting angle. The white dashed line is a fit using Eq. 5 in the Methods, which yields a canting angle  $\gamma = 0.87^\circ$ . **d.** Mapping of  $R(\theta, \varphi)$  after subtracting the effect of canting angle.

The  $2H$ -type MoS<sub>2</sub> and NbSe<sub>2</sub> are identical in the crystal structure, except for a shift of transition metal position, which is further divided as  $2H_a$  and  $2H_b$  types. Since Mo has one more valence electron than Nb, the  $2H$ -MoS<sub>2</sub> has a fully filled band. By chemical intercalation or electrostatic gating, the semiconducting MoS<sub>2</sub> can be doped into metallic states, where superconductivity is realized at a carrier density  $n_{2D} > 8 \times 10^{13} \text{ cm}^{-2}$ . The ion-gated few-layer MoS<sub>2</sub> is superconducting only in the top first layer due to the strong screening effect of the electric field<sup>8</sup>. Like a NbSe<sub>2</sub> monolayer, the broken inversion symmetry induces the Ising SOC, which locks the electron spins to the out-of-plane direction, strongly protecting the Cooper pairs against an in-plane field  $B_{\parallel}$ . Therefore, the  $B_{c2,\parallel}$  can go well beyond the Pauli limit  $B_p$ , reaching  $\sim 6B_p$ <sup>8</sup>.

1 Comparing the superconductivity in a multilayer NbSe<sub>2</sub> and a confined monolayer MoS<sub>2</sub> can highlight  
2 the contribution of current-driven vortex motion in the out-of-plane direction, which only exists in a  
3 multilayer. We perform the exact measurement to study the anisotropy of superconducting MoS<sub>2</sub> ( $T_c = 6$   
4 K) in a parallel  $B$  field. As shown in Fig. S5, after subtracting the contribution of the canting angle ( $\gamma =$   
5  $0.87^\circ$ ), the superconductivity is highly isotropic. Therefore, the two-fold anisotropy induced by the  
6 Lorentz force is not observed in this control experiment as the interlayer motion is completely suppressed  
7 in a monolayer superconductor.

8 The absence of two-fold anisotropy confirms that the ionic gating induces superconductivity in the outer  
9 first layer. More importantly, since monolayer thickness prohibits any interlayer interaction, this also  
10 suppresses the FFLO state since the orbital FFLO phase observed in multilayer NbSe<sub>2</sub> requires an  
11 interlayer orbital effect between two Ising superconducting layers with inversion symmetry. Hence, the  
12 six-fold anisotropy associated with the orbital FFLO phase is also absent in the ion-gated MoS<sub>2</sub>.

13

14

## 5. Excluding the two-gap scenario for the upturn in $B_{c2}(T)$

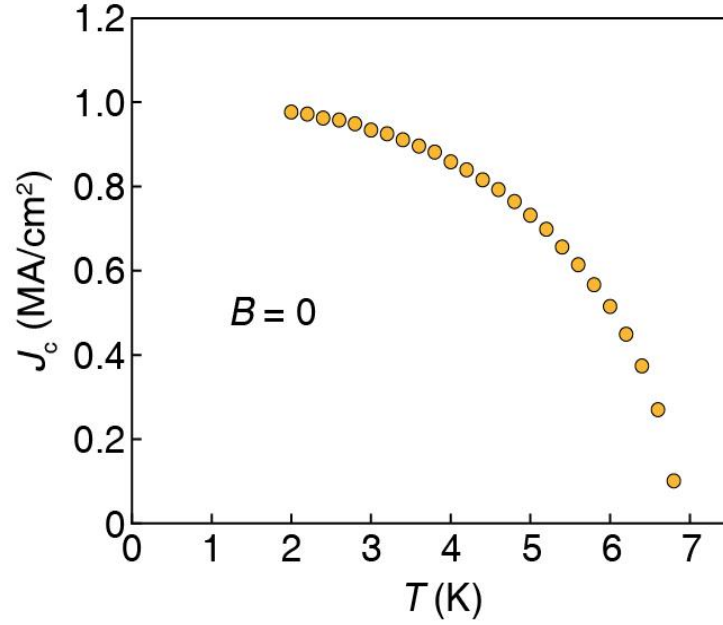

**Figure S6 | Critical current density as a function of temperature under a zero magnetic field.** At  $B = 0$  T, no upturn was observed in the temperature dependence of  $J_c$ . This rules out the two-gap scenario as the cause of the upturns.

The superconducting gaps of NbSe<sub>2</sub> open at both  $K$  and  $\Gamma$  points for both hole- and electron-like pockets as shown in the ARPES results<sup>7,9</sup>. The multiple gaps of different gap size may lead to kinks in both  $B_{c2}(T)$ <sup>10</sup> and  $J_c(T)$ <sup>11</sup>. On the other hand, in dirty two-gap superconductors, the upturn in  $B_{c2}(T)$  is also expected due to interband scattering<sup>10</sup>.

First of all, we can rule out the possibility of having the dirty two-gap scenario since our device shows superconductivity in the clean regime. Furthermore, the kink observed in  $|\theta| < 1^\circ$ , as shown in the  $B_{c2}(\theta)$  in Main Text Fig. 2b, can not be described by the dirty two-gap model<sup>10</sup>. Second, the two-gap scenario would expect the temperature dependence of  $J_c$  to show a kink when the second gap opens at  $T < T_{c0}$  under the zero  $B$  field<sup>11</sup>. As shown in Fig. S6, the  $J_c(T)$  measured at  $B = 0$  T has a smooth dependence without showing kink as a function of temperature. Instead, the kinks in  $J_c$  appear when the  $B$  field is applied crossing the uniform superconductor/orbital FFLO phase boundary as shown in Main Text Fig. 4a. The phase boundary thus determined by  $J_c(B)$  agrees well with the tricritical point that is determined by  $B_{c2}(T)$  measurements. Hence, we can also safely rule out the two-gap scenario as the cause of the kinks observed in our devices.

## 1   **References**

- 2   1.    Corcoran, R. *et al.* Quantum oscillations in the mixed state of the type II superconductor 2H-  
3       NbSe<sub>2</sub>. *J. Phys. Condens. Matter* **6**, 4479 (1994).
- 4   2.    Yokoya, T. Fermi Surface Sheet-Dependent Superconductivity in 2H-NbSe<sub>2</sub>. *Science* **294**, 2518–  
5       2520 (2001).
- 6   3.    Rossnagel, K. *et al.* Fermi surface of 2H-NbSe<sub>2</sub> and its implications on the charge-density-wave  
7       mechanism. *Phys. Rev. B* **64**, 1–6 (2001).
- 8   4.    Bel, R., Behnia, K. & Berger, H. Ambipolar Nernst Effect in NbSe<sub>2</sub>. *Phys. Rev. Lett.* **91**, 2–5  
9       (2003).
- 10  5.    Ong, N. P. Geometric interpretation of the weak-field Hall conductivity in two-dimensional  
11       metals with arbitrary Fermi surface. *Phys. Rev. B* **43**, 193–201 (1991).
- 12  6.    Tinkham, M. *Introduction to Superconductivity 2nd.* (Dover, 1996).
- 13  7.    Rahn, D. J. *et al.* Gaps and kinks in the electronic structure of the superconductor 2H-NbSe<sub>2</sub>  
14       from angle-resolved photoemission at 1 K. *Phys. Rev. B* **85**, 1–8 (2012).
- 15  8.    Lu, J. M. *et al.* Evidence for two-dimensional Ising superconductivity in gated MoS<sub>2</sub>. *Science*  
16       **350**, 1353–1357 (2015).
- 17  9.    Kiss, T. *et al.* Charge-order-maximized momentum-dependent superconductivity. *Nat. Phys.* **3**,  
18       720–725 (2007).
- 19  10.   Gurevich, A. Enhancement of the upper critical field by nonmagnetic impurities in dirty two-gap  
20       superconductors. *Phys. Rev. B* **67**, 184515 (2003).
- 21  11.   Talantsev, E. F. *et al.* On the origin of critical temperature enhancement in atomically thin  
22       superconductors. *2D Mater.* **4**, 025072 (2017).

23
